# Supplementary material
Source: PubMed Central journal article supplement (PMC3275346)
Supplement: NIHMS331951-supplement-1.pdf [file NIHMS331951-supplement-1.pdf]

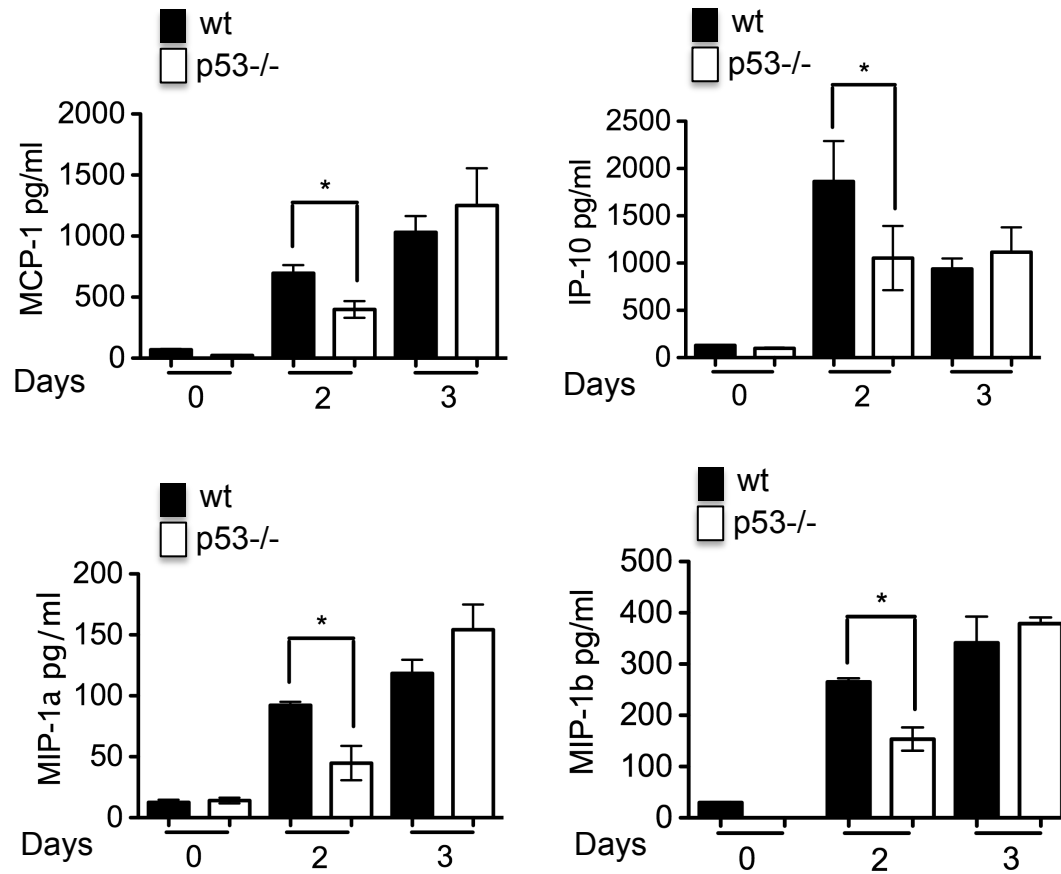

**Supplementary Figure 1.** Cytokines from fresh lung homogenates of wt and p53<sup>-/-</sup> mice infected with X31 virus at the indicated time points assessed by multiplex ELISA. Whole lungs were ground in 1.8 ml 0.1% gelatin/PBS. Cytokine concentration in the lungs and serum was analyzed by 12 plex multiplex ELISA (Millipore). Mock (M)-infected animals were used as controls.
