# Supplementary material
Source: PubMed Central journal article supplement (PMC3275346)
Supplement: NIHMS331951-supplement-2.pdf [file NIHMS331951-supplement-2.pdf]

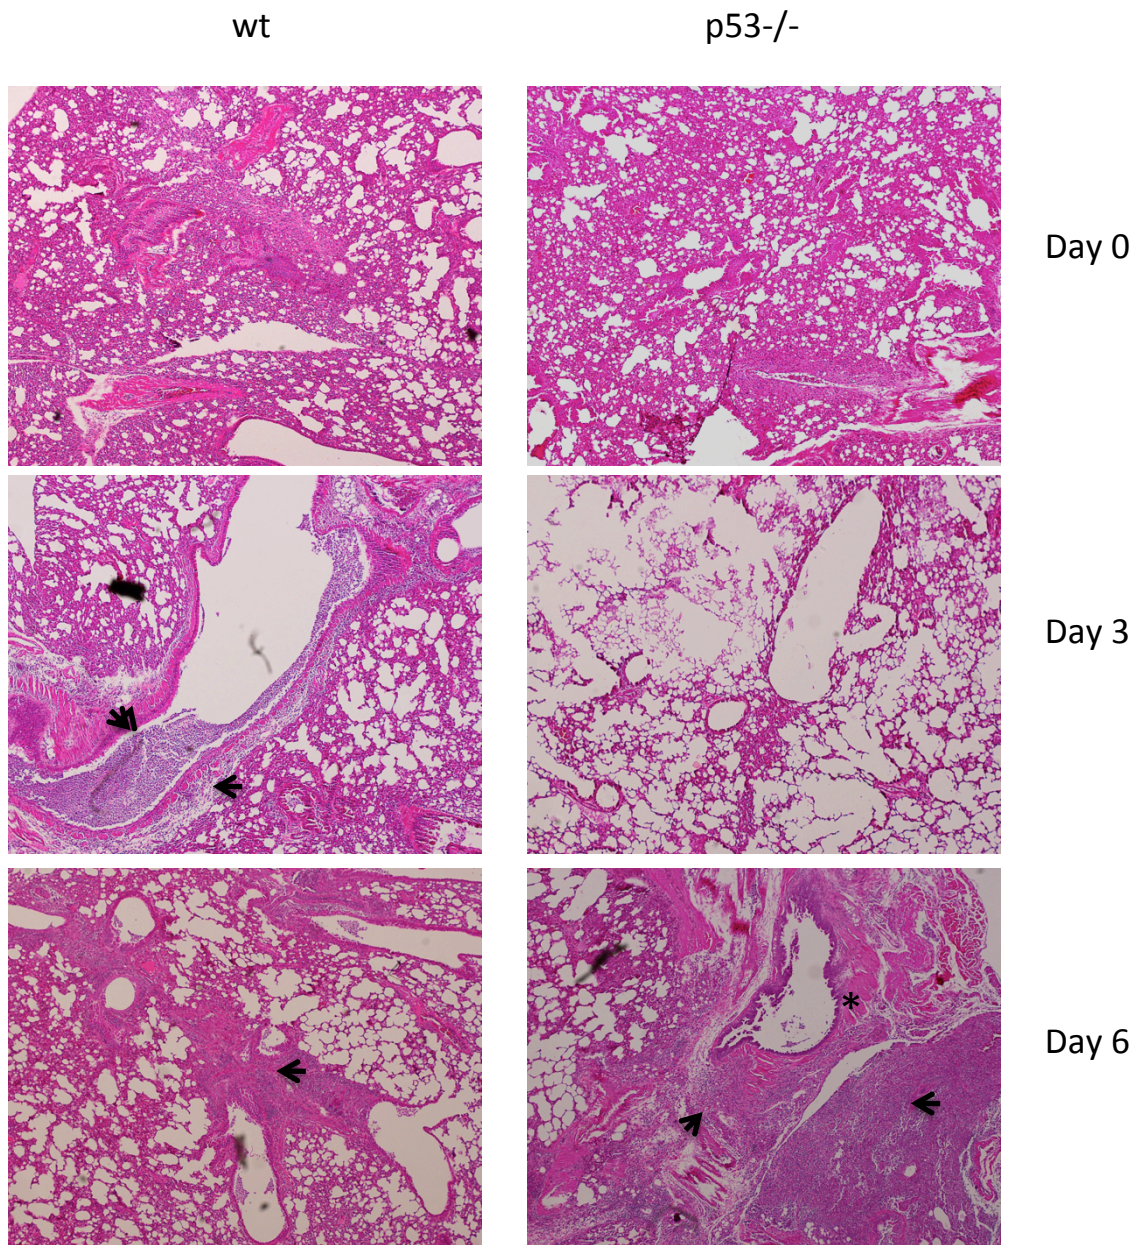

**Supplementary Figure 2.** Hematoxylin-Eosin staining of formalin-fixed lung tissue samples harvested from mice infected with IAV at the indicated time points. Lungs embedded in paraffin wax sections (5 $\mu$ M) were cut and stained with hematoxylin and then counterstained with eosin (H&E). The sections were analyzed for parameters indicative of pulmonary inflammation, the degree of interstitial leukocyte infiltration, and the presence of bronchial epithelial necrosis. Two investigators, who were blinded to the identity of each histological specimen, scored each section. Arrows indicate areas of leukocyte infiltration and asterisks indicate bronchial epithelial necrosis.
