# Supplementary material
Source: PubMed Central journal article supplement (PMC3275346)
Supplement: NIHMS331951-supplement-4.pdf [file NIHMS331951-supplement-4.pdf]

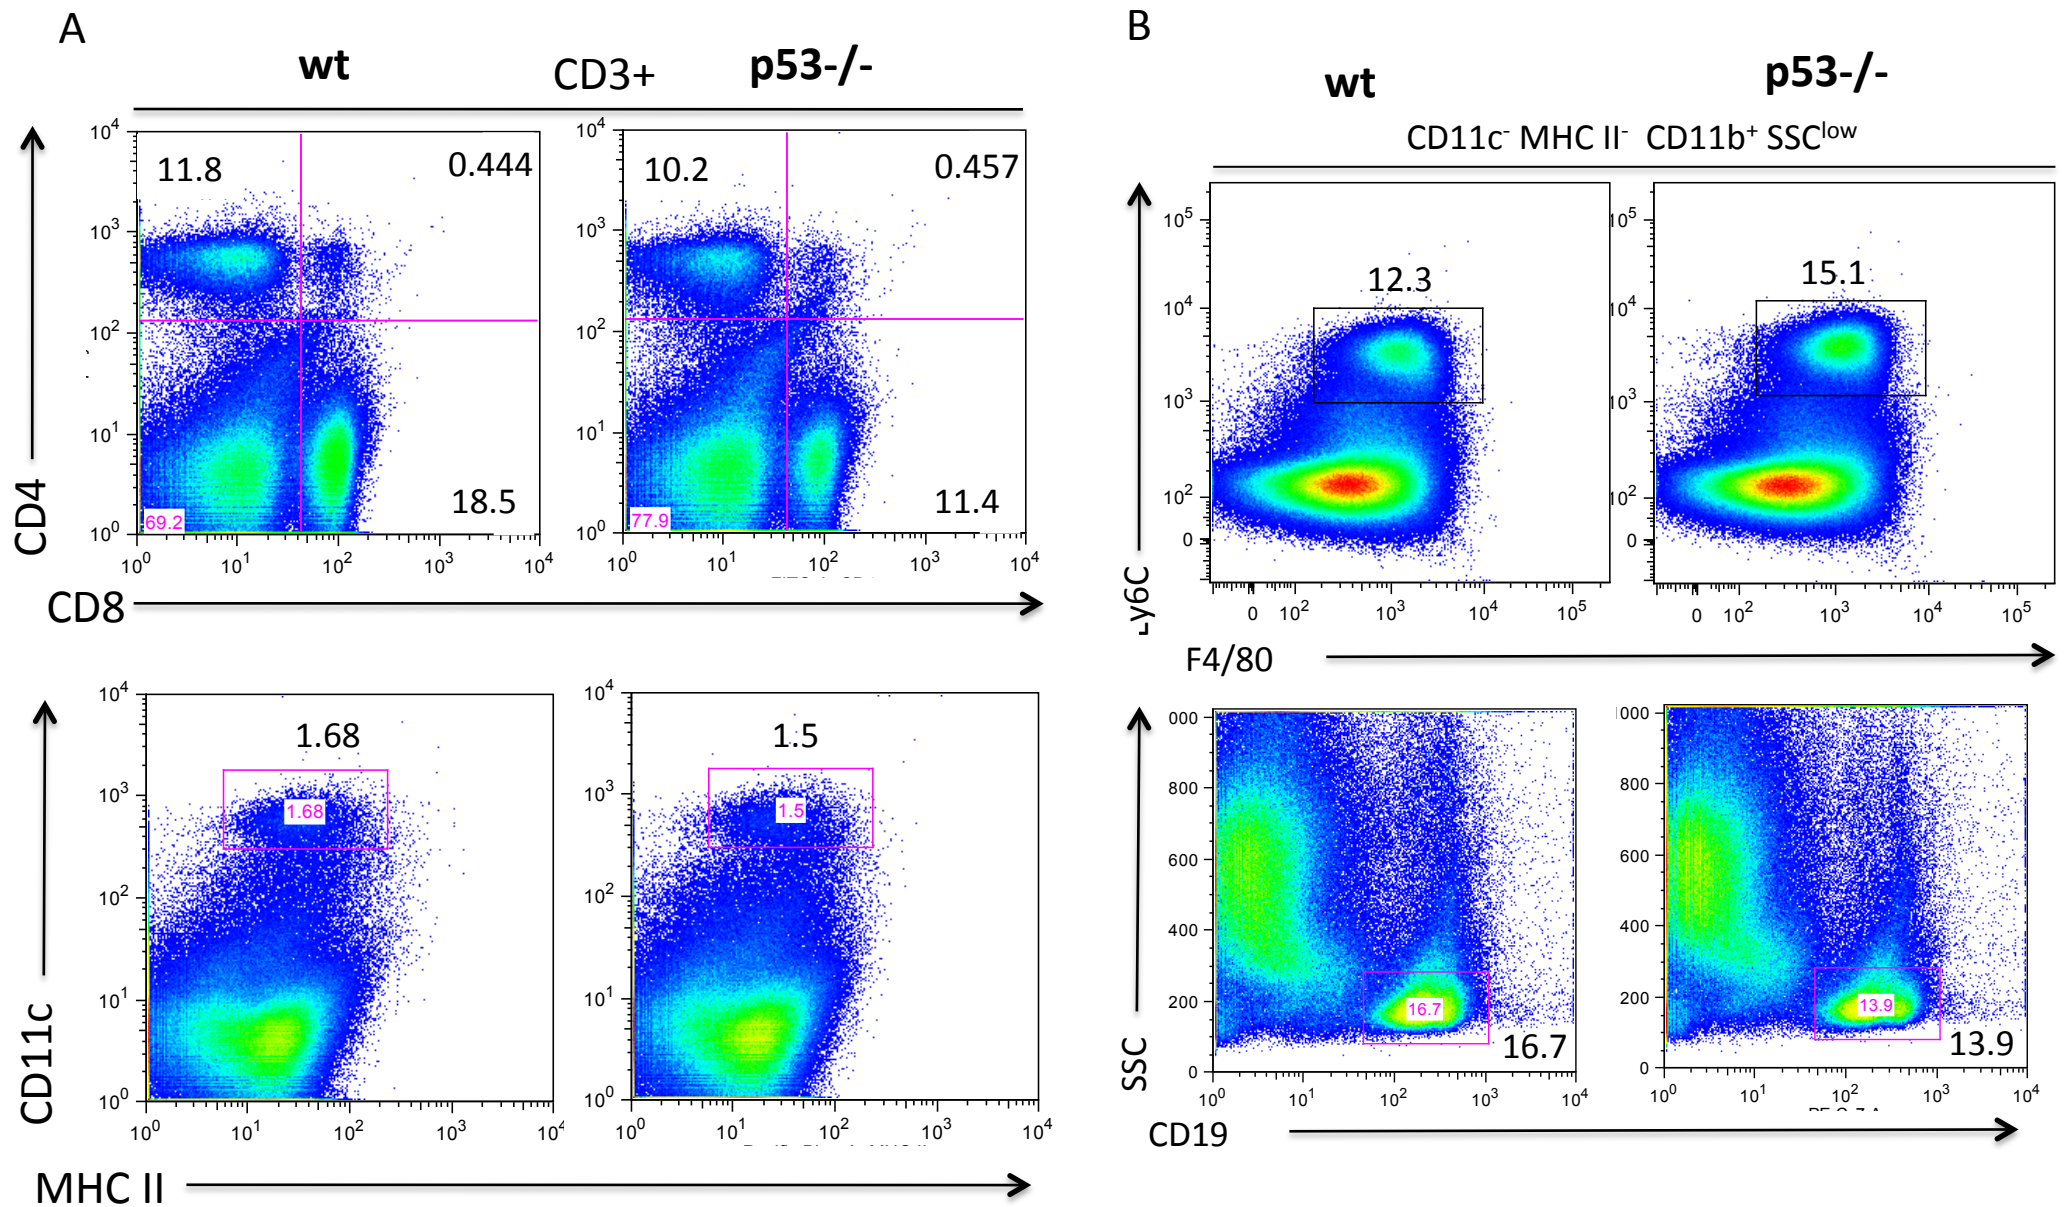

**Supplementary Figure 4.** Analysis of leukocyte cellularity in spleens and bone marrow of naïve wt and p53<sup>-/-</sup> mice. Single cell suspensions were obtained by mechanical disruption of tissues and use of a 70 mm cell strainer. Flow cytometry analysis was performed as described in the Materials and Methods section.
